# Supplementary material for: Two approaches for estimating the lower limit of quantitation (LLOQ) of microRNA levels assayed as exploratory biomarkers by RT-qPCR
Source: PubMed Central journal article supplement (PMC5796571; doi:10.1186/s12896-018-0415-4), 2018-02-02
Supplement: 12896_2018_415_MOESM8_ESM.pdf [file 12896_2018_415_MOESM8_ESM.pdf]

| <b>Approach</b>             | <b>Logistic Modeling</b>                                                                                                                                      | <b>Baseline Noise</b>                                                                                      |
|-----------------------------|---------------------------------------------------------------------------------------------------------------------------------------------------------------|------------------------------------------------------------------------------------------------------------|
| <b>Overview</b>             | Fits a logistic model to calibration curves and uses resulting estimates to determine LLOQ.                                                                   | Uses No Template Control (NTC) values and a set of well-proven empirical rules to determine LLOQ.          |
| <b>Caveats and Concerns</b> | Choosing a specific logistic model, error metric, threshold, and sliding window requires some consideration. The model may not fit well to poor-quality data. | NTC samples should be assayed appropriately and rules checked and followed closely to ensure good results. |
